# Supplementary material
Source: Springer Nature journal article supplement (https://www.springermedizin.de/resource/supplementary/12967_2014_1823_MOESM5_ESM.pdf/9574900)

**A****Bcl2/BAX**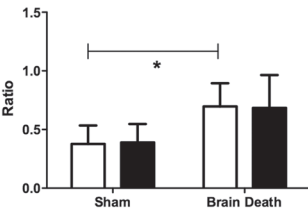**C3**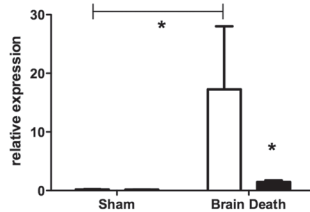**HO-1**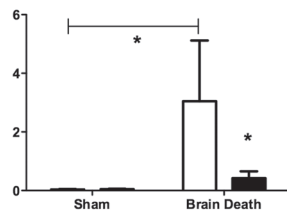**HSP-70**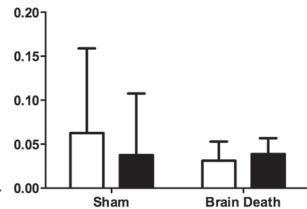**B****Bcl2/BAX**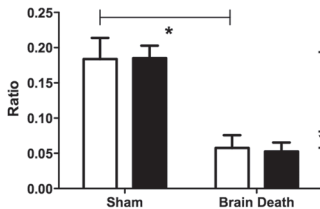**C3**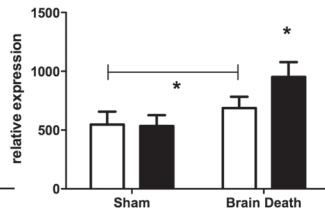**HO-1**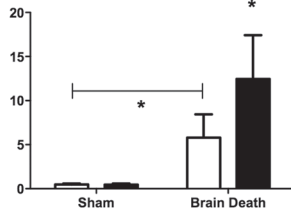**HSP-70**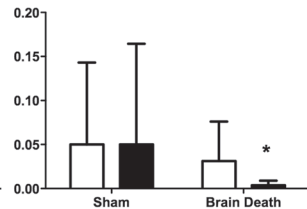

Saline

Prednisolone

\*  $p < 0.05$

Supplement: MOESM5 [file 9574900]
